# Supplementary material for: Cardiomyopathies in 100,000 genomes project: interval evaluation improves diagnostic yield and informs strategies for ongoing gene discovery
Source: Genome Med. 2024 Oct 29;16:125. doi: 10.1186/s13073-024-01390-9 (PMC11520845; doi:10.1186/s13073-024-01390-9)
Supplement: Supplementary file 1 — Additional file 1: All supplementary tables. Table S1 Candidate gene list used as part of the re-analysis of paediatric cardiomyopathy probands. Table S2 List of genes included in different paediatric or syndromic cardiomyopathy panels. Table S3 List of genes associated with cardiomyopathy identified from literature. Table S4 List of genes in version 1 of the UK PanelApp cardiomyopathy panels. Table S5 Filters used for de novo variant annotations in 100,000 Genomes Project taken from Genomics England Research Documentation, https://re-docs.genomicsengland.co.uk/de_novo_data/. Table S6 Demographic and clinical details of the paediatric and adult cardiomyopathy cohorts when stringent criteria are used to define children (age at consent ≤ 16 years). Table S7 Family structures at enrolment for the paediatric and adult cardiomyopathy cohorts when stringent criteria are used to define children (age at consent ≤ 16 years). Table S8 Number of paediatric and adult cardiomyopathy probands by disease recruitment category in the 100,000 Genome Project and the number and percentage of solved probands, using stringent criteria to define children. Table S9 Recruitment categories used for those paediatric and adult probands (Complex CM probands) not recruited under a cardiomyopathy specific category. Table S10 Variant details for genetically‘solved’ paediatric cardiomyopathy probands following GEL’s initial analysis. Table S11 Variant details for genetically ‘solved’ adult cardiomyopathy probands following GEL’s initial analysis. Table S12 Variant details for paediatric cardiomyopathy probands following a re-analysis. [file 13073_2024_1390_MOESM1_ESM.xlsx]

## Sheet: Contents
Table S1	Candidate gene list used as part of the re-analysis of paediatric cardiomyopathy probands
Table S2	List of genes included in different paediatric or syndromic cardiomyopathy panels
Table S3	List of genes associated with cardiomyopathy identified from literature
Table S4	List of genes in version 1 of the UK PanelApp cardiomyopathy panels
Table S5	Filters used for de novo variant annotations in 100,000 Genomes Project taken from Genomics England Research Documentation
Table S6	Demographic and clinical details of the paediatric and adult cardiomyopathy cohorts when stringent criteria are used to define children (age at consent <= 16 years)
Table S7	Family structures at enrolment for the paediatric and adult cardiomyopathy cohorts when stringent criteria are used to define children (age at consent <= 16 years)
Table S8	Number of paediatric and adult cardiomyopathy probands by disease recruitment category in the 100,000 Genome Project and the number and percentage of solved probands, using stringent criteria to define children
Table S9	Recruitment categories used for those paediatric and adult probands (Complex CM probands) not recruited under a cardiomyopathy specific category
Table S10	Variant details for genetically ‘solved’ paediatric cardiomyopathy probands following GEL’s initial analysis
Table S11	Variant details for genetically ‘solved’ adult cardiomyopathy probands following GEL’s initial analysis
Table S12	Variant details for paediatric cardiomyopathy probands following a re-analysis

## Sheet: Table S1
Table S1: Candidate gene list. Includes UK PanelApp R135 Green and Amber nuclear encoded genes (v3.44) plus nuclear encoded genes on other panels including Invitae with extended panel, GeneDx, Ambry, Laboratory for Molecular Medicine, PanelApp Australia, Amsterdam Genetics (excluding mitochondrial genes). It also includes any other novel genes discovered in the literature or through other paediat…
Gene
A2ML1
AARS2
AASDH
ABCC9
ACACB
ACAD9
ACADVL
ACTA1
ACTC1
ACTN2
AGK
AGL
AIFM1
AKAP9
ALMS1
ALPK3
ANK2
ANKRD1
ANKRD11
ARSB
ATAD3A
ATP5F1D
ATPAF2
BAG3
BAG5
BRAF
BSCL2
C1QBP
CACNA1C
CALM1
CALR3
CAMK2G
CAP2
CAV3
CAVIN4
CBL
CDH2
CEP135
CHRM2
COA5
COA6
COQ4
COQ9
COX10
COX14
COX15
COX20
COX6B1
COX7B
CPT2
CRLS1
CRYAB
CSRP3
CTF1
CTNNA3
DES
DMD
DNAJC19
DOLK
DSC2
DSG2
DSP
DTNA
ELAC2
EMD
EPG5
EYA4
FAH
FASTKD2
FBXL4
FHL1
FHL2
FHOD3
FKRP
FKTN
FLII
FLNC
FNIP1
FOXRED1
FXN
GAA
GATA4
GATA6
GATAD1
GLA
GLB1
GSN
GUSB
GYG1
HADHA
HADHB
HAND1
HCN4
HFE
HGSNAT
HRAS
HSD17B10
IDH2
IDS
IDUA
ILK
JPH2
JUP
KIF20A
KLF10
KLHL24
KRAS
LAMA4
LAMP2
LDB3
LETM1
LMNA
LMOD2
LRPPRC
LRRC10
LZTR1
MAP2K1
MAP2K2
MAP3K7
MAP3K8
MCOLN1
MED12
MIB1
MIPEP
MLYCD
MMACHC
MMUT
MRAS
MRPL44
MRPS22
MTO1
MYBPC3
MYH6
MYH7
MYL2
MYL3
MYLK2
MYLK3
MYOM1
MYOZ2
MYPN
NAA10
NAA15
NAGLU
NAXD
NDUFA1
NDUFA10
NDUFA11
NDUFA2
NDUFA4
NDUFAF1
NDUFAF2
NDUFAF3
NDUFAF4
NDUFAF5
NDUFB11
NDUFB3
NDUFB8
NDUFS1
NDUFS2
NDUFS3
NDUFS4
NDUFS6
NDUFS7
NDUFS8
NDUFV1
NDUFV2
NEB
NEBL
NEK8
NEXN
NF1
NKX2-5
NONO
NPHS2
NPPA
NRAP
NRAS
NUBPL
PCCA
PCCB
PDE4DIP
PDLIM3
PET100
PGM1
PKP2
PLD1
PLEKHM2
PLN
PMM2
PNPLA2
PPA2
PPCS
PPP1CB
PPP1R13L
PRDM16
PRKAG2
PTGDS
PTPN11
RAF1
RASA1
RASA2
RBCK1
RBM20
RHBDF1
RIT1
RLF
RND1
RNF220
RPL3L
RPS6KA3
RRAGC
RRAGD
RRAS
RYR1
RYR2
SCN5A
SCO1
SCO2
SDHA
SDHAF1
SDHD
SGCD
SGCG
SGSH
SHMT2
SHOC2
SLC22A5
SLC25A20
SLC25A3
SLC25A4
SLC30A5
SMURF1
SOS1
SOS2
SPEG
SPRED1
SPRED2
SURF1
TAB2
TAF1A
TAFAZZIN
TBX20
TBX5
TCAP
TGFB3
TMEM126B
TMEM43
TMEM70
TMPO
TNNC1
TNNI3
TNNI3K
TNNT2
TOR1AIP1
TPM1
TRIM37
TRIM63
TRPM4
TSFM
TTN
TTR
TXNRD2
ULK1
UQCC2
UQCRFS1
VCL

## Sheet: Table S2
Table S2: Cardiomyopathy panel lists
R135 - paediatric or syndromic cardiomyopathy panel, green list v3.44	All_other_panels - last accessed Novemeber 2023
PanelAppUK	PanelAppUk R135 Amber genes	Invitae Cardiomyopathy (with extended panel to include preliminary evidence genes)	GeneDx Cardiomyopathy Panel	Ambry CMNext panel	Laboratory for Molecular Medicine PanCardiomyopathy Panel	PanelApp Australia Cardiomyopathy Paediatric	Amsterdam Genetics NGS Cardiomyopathy
AARS2	AGL	ABCC9	ABCC9	ABCC9	ABCC9	AARS2	ACTC1
ABCC9	ANK2	ACADVL	ACTC1	ACTC1	ACTC1	ABCC9	ACTN2
ACAD9	ARSB	ACTC1	ACTN2	ACTN2	ACTN2	ACAD9	ALPK3
ACADVL	ATP5F1D	ACTN2	AKAP9	ALMS1	ANKRD1	ACADVL	ANKRD1
ACTA1	ATPAF2	AGL	ALMS1	ALPK3	BAG3	ACTA1	BAG3
ACTC1	BRAF	ALMS1	ALPK3	ANKRD1	CASQ2	ACTC1	CALR3
ACTN2	CBL	ALPK3	ANKRD1	BAG3	CAV3	ACTN2	CAV3
AGK	COX14	BAG3	BAG3	CRYAB	CAVIN4	AGK	CDH2
ALMS1	COX20	BRAF	BRAF	CSRP3	CHRM2	AGL	CRYAB
ALPK3	COX6B1	CACNA1C	CAV3	DES	CRYAB	ALMS1	CSRP3
BAG3	COX7B	CBL	CHRM2	DMD	CSRP3	ALPK3	CTNNA3
CACNA1C	CRLS1	CPT2	CRYAB	DOLK	DES	ARSB	DES
CDH2	CRYAB	CRYAB	CSRP3	DSC2	DMD	ATAD3A	DMD
COA5	EYA4	CSRP3	CTNNA3	DSG2	DOLK	ATP5F1D	DSC2
COA6	FAH	DES	DES	DSP	DSC2	BAG3	DSG2
COX10	FASTKD2	DMD	DMD	EMD	DSG2	BRAF	DSP
COX15	FKRP	DNAJC19	DOLK	FHL1	DSP	CACNA1C	EMD
CPT2	FLII	DOLK	DSC2	FKRP	DTNA	CAP2	FHL1
CSRP3	FNIP1	DSC2	DSG2	FLNC	EMD	CBL	FHL2
DES	FOXRED1	DSG2	DSP	GLA	FHL2	COA6	FHOD3
DMD	GATA6	DSP	DTNA	HCN4	GATAD1	COQ4	FKRP
DNAJC19	GLA	ELAC2	EMD	JPH2	GLA	COQ9	FLNC
DOLK	GLB1	EMD	EYA4	JUP	ILK	COX10	GLA
DSC2	GSN	EYA4	FHL1	LAMA4	JPH2	COX15	HCN4
DSG2	HCN4	FHL1	FKRP	LAMP2	JUP	COX20	JPH2
DSP	HFE	FKRP	FKTN	LDB3	LAMA4	CPT2	JUP
EMD	HGSNAT	FKTN	FLNC	LMNA	LAMP2	CSRP3	LAMA4
EPG5	IDS	FLNC	GAA	MYBPC3	LDB3	DES	LAMP2
FHL1	LRPPRC	GAA	GATA4	MYH6	LMNA	DMD	LDB3
FHOD3	MIB1	GLA	GATAD1	MYH7	MYBPC3	DNAJC19	LMNA
FKTN	MMACHC	HCN4	GLA	MYL2	MYH6	DOLK	MIB1
FLNC	MT-TI	HRAS	HCN4	MYL3	MYH7	DSC2	MYBPC3
GAA	NAA10	JUP	HFE	MYPN	MYL2	DSG2	MYH6
GUSB	NAA15	KRAS	HRAS	NEXN	MYL3	DSP	MYH7
HADHA	NAGLU	LAMP2	ILK	NKX2-5	MYLK2	ELAC2	MYL2
HADHB	NDUFA1	LMNA	JPH2	PKP2	MYOM1	EMD	MYL3
HRAS	NDUFA10	LZTR1	JUP	PLN	MYOZ2	EPG5	MYLK3
IDH2	NDUFA4	MAP2K1	KRAS	PRKAG2	MYPN	FAH	MYOZ2
IDUA	NDUFAF2	MAP2K2	LAMA4	PTPN11	NEBL	FHL1	MYPN
JPH2	NDUFAF3	MRAS	LAMP2	RAF1	NEXN	FHOD3	NEXN
JUP	NDUFAF4	MTO1	LDB3	RBM20	PDLIM3	FKTN	PKP2
KRAS	NDUFAF5	MYBPC3	LMNA	RIT1	PKP2	FLII	PLN
LAMP2	NDUFB3	MYH7	LRRC10	RYR2	PLN	FLNC	PPA2
LMNA	NDUFB8	MYL2	MAP2K1	SCN5A	PRDM16	FNIP1	PRDM16
LMOD2	NDUFS1	MYL3	MAP2K2	SOS1	PRKAG2	GAA	PRKAG2
LZTR1	NDUFS3	MYLK3	MIB1	TAZ	PTPN11	GLB1	RBM20
MAP2K1	NDUFS4	NF1	MT-ND1	TBX20	RAF1	GUSB	SCN5A
MAP2K2	NDUFS6	NRAS	MT-ND5	TCAP	RBM20	HADHA	TAFAZZIN
MLYCD	NDUFS7	PCCA	MT-ND6	TMEM43	RYR2	HADHB	TCAP
MRAS	NDUFV1	PCCB	MT-TD	TNNC1	SCN5A	HCN4	TMEM43
MRPL44	NF1	PKP2	MT-TG	TNNI3	SGCD	HRAS	TNNC1
MMUT	NUBPL	PLN	MT-TH	TNNT2	TAZ	HSD17B10	TNNI3
MYBPC3	PDLIM3	PPCS	MT-TI	TPM1	TCAP	IDH2	TNNI3K
MYH6	PET100	PPP1CB	MT-TK	TTN	TMEM43	IDS	TNNT2
MYH7	PNPLA2	PRKAG2	MT-TL1	TTR	TNNC1	IDUA	TPM1
MYL2	RASA2	PTPN11	MT-TL2	VCL	TNNI3	JUP	TRIM63
MYL3	RHBDF1	RAF1	MT-TM		TNNT2	KRAS	TTN
MYLK3	RNF220	RASA1	MT-TQ		TPM1	LAMP2	TTR
MYPN	RPL3L	RBM20	MT-TS1		TRDN	LDB3	VCL
NDUFA11	SDHA	RIT1	MT-TS2		TTN	LMNA
NDUFA2	SDHAF1	RYR2	CAVIN4		TTR	LMOD2
NDUFAF1	SDHD	SCN5A	MYBPC3		VCL	LRPPRC
NDUFB11	SGCD	SDHA	MYH6			LZTR1
NDUFS2	SGSH	SGCD	MYH7			MAP2K1
NDUFS8	SHMT2	SHOC2	MYL2			MAP2K2
NDUFV2	SLC30A5	SLC22A5	MYL3			MIPEP
NEXN	SURF1	SOS1	MYLK2			MLYCD
NKX2-5	TMEM126B	SOS2	MYOZ2			MRAS
NONO	TOR1AIP1	SPRED1	MYPN			MRPL44
NRAP	UQCC2	TAFAZZIN	NEBL			MRPS22
NRAS		TBX20	NEXN			MMUT
PCCA		TCAP	NKX2-5			MYBPC3
PCCB		TMEM43	NRAS			MYH6
PKP2		TMEM70	PDLIM3			MYH7
PLD1		TNNC1	PKP2			MYL2
PLN		TNNI3	PLN			MYL3
PPA2		TNNI3K	PRDM16			MYPN
PPCS		TNNT2	PRKAG2			NDUFA1
PPP1CB		TPM1	PTPN11			NDUFA10
PPP1R13L		TTN	RAF1			NDUFA2
PRKAG2		TTR	RBM20			NDUFAF1
PTPN11		VCL	RIT1			NDUFAF2
RAF1		A2ML1	RYR2			NDUFAF3
RBM20		ANKRD1	SCN5A			NDUFAF5
RIT1		CALR3	SGCD			NDUFB11
RRAGC		CAV3	SHOC2			NDUFB3
RRAGD		CDH2	SOS1			NDUFS1
RYR2		CHRM2	TAFFAZIN			NDUFS2
SCN5A		CTF1	TBX20			NDUFS3
SCO1		CTNNA3	TCAP			NDUFS4
SCO2		DTNA	TGFB3			NDUFS6
SHOC2		FHL2	TMEM43			NDUFS7
SLC22A5		GATA4	TMPO			NDUFS8
SLC25A20		GATA6	TNNC1			NDUFV1
SLC25A4		GATAD1	TNNI3			NDUFV2
SOS1		HAND1	TNNT2			NEXN
SOS2		ILK	TOR1AIP1			NF1
SPEG		JPH2	TPM1			NKX2-5
SPRED2		KIF20A	TTN			NONO
TAFFAZIN		KLF10	TTR			NRAP
TBX20		LAMA4	TXNRD2			NRAS
TMEM43		LDB3	VCL			NUBPL
TMEM70		LRRC10				PCCA
TNNC1		MAP3K8				PCCB
TNNI3		MED12				PGM1
TNNI3K		MYH6				PKP2
TNNT2		MYLK2				PLD1
TPM1		MYOM1				PLN
TSFM		MYOZ2				PMM2
TTN		MYPN				PNPLA2
TTR		NEBL				PPA2
VCL		NEXN				PPCS
		NKX2-5				PPP1CB
		NPPA				PPP1R13L
		PDLIM3				PRDM16
		PLEKHM2				PRKAG2
		PRDM16				PTPN11
		RASA2				RAF1
		RRAS				RBCK1
		TMPO				RBM20
		TXNRD2				RIT1
						RNF220
						RPL3L
						RRAGC
						RRAGD
						RYR2
						SCN5A
						SCO2
						SDHA
						SDHAF1
						SDHD
						SGCD
						SHMT2
						SHOC2
						SLC22A5
						SLC25A20
						SLC25A4
						SOS1
						SOS2
						SPEG
						SURF1
						TAB2
						TAZ
						TBX20
						TBX5
						TMEM126B
						TMEM43
						TMEM70
						TNNC1
						TNNI3
						TNNI3K
						TNNT2
						TOR1AIP1
						TPM1
						TSFM
						TTN
						TTR
						UQCRFS1
						VCL

## Sheet: Table S3
Table S3: Genes identified by other paediatric cardiomyopathy studies or in the literature as case reports with the corresponding PubMed ID
Gene	Reference
PRDM16	PMID 29367541
RRAGC	PMID 29367541
TAF1A	PMID 29367541
ALMS1	PMID 29367541
TNNT2	PMID 29367541
LMNA	PMID 29367541
RBM20	PMID 29367541
CALM1	PMID 30384889
NEK8	PMID 30384889
TAB2	PMID 30384889
MRPL44	PMID 30384889
AARS2	PMID 30384889
HADHB	PMID 30384889
DNAJC19	PMID 30384889
PRKAG2	PMID 30384889
HRAS	PMID 30384889
PPA2	PMID 30384889
TAFFAZIN	PMID 30384889
BAG3	PMID 30384889
NEK8	PMID 30384889
TAB2	PMID 30384889
PTPN11	PMID 30384889
RAF1	PMID 30384889
JPH2	PMID 30384889
CALM1	PMID 30384889
CACNA1C	PMID 30384889
TNNC1	PMID 30384889
TNNI3	PMID 30384889
ACTC1	PMID 30384889
MYH7	PMID 30384889
NRAP	PMID 30384889
TBX20	PMID 30384889
CEP135	PMID 29517769
TNNT2	PMID 29517769
SCN5A	PMID 29517769
TTN	PMID 29517769
TPM1	PMID 29517769
MYL2	PMID 29517769
MYH7	PMID 29517769
SPEG	PMID 29517769
GLB1	PMID 29517769
AASDH	PMID 32870709
ACACB	PMID 32870709
BSCL2	PMID 32870709
ELAC2	PMID 32870709
FBXL4	PMID 32870709
FLII	PMID 32870709
KLHL24	PMID 32870709
LDB3	PMID 32870709
RHBDF1	PMID 32870709
RPL3L	PMID 32870709
ACADVL	PMID 32870709
GAA	PMID 32870709
NRAP	PMID 32870709
ALMS1	PMID 32870709
DSP	PMID 32870709
MYLK3	PMID 32870709
NEXN	PMID 32870709
FLNC	PMID 32870709
JPH2	PMID 32870709
PKP2	PMID 32870709
PPP1R13L	PMID 32870709
RAF1	PMID 32870709
TNNI3	PMID 32870709
ACAD9	PMID 32870709
AGK	PMID 32870709
DOLK	PMID 32870709
MYBPC3	PMID 32870709
SHOC2	PMID 32870709
SLC22A5	PMID 32870709
TAFFAZIN	PMID 32870709
VCL	PMID 32870709
TMEM70	PMID 32870709
ULK1	PMID 32870709
FXN	PMID 36252119
MYH7	PMID 36252119
MYBPC3	PMID 36252119
TNNT2	PMID 36252119
TNNI3	PMID 36252119
LAMP2	PMID 36252119
LZTR1	PMID 36252119
ACTC1	PMID 36252119
CACNA1C	PMID 36252119
NDUFB11	PMID 36252119
PRKAG2	PMID 36252119
PTPN11	PMID 36252119
RAF1	PMID 36252119
RIT1	PMID 36252119
FLNC	PMID 36252119
TTN	PMID 36252119
ALMS1	PMID 36252119
HADHA	PMID 36252119
PPP1R13L	PMID 36252119
DSP	PMID 36252119
ACTC1	PMID 36252119
TAFFAZIN	PMID 36252119
TPM1	PMID 36252119
PRDM16	PMID 36252119
BAG5	PMID 35288587
CAMK2G	PMID 35288587
PDE4DIP	PMID 35288587
PTGDS	PMID 35288587
RLF	PMID 35288587
RND1	PMID 35288587
SMURF1	PMID 35288587
TRPM4	PMID 35288587
ACTC1	PMID 35288587
ALPK3	PMID 35288587
DSC2	PMID 35288587
FLNC	PMID 35288587
LAMP2	PMID 35288587
LMNA	PMID 35288587
MYBPC3	PMID 35288587
MYH7	PMID 35288587
PLN	PMID 35288587
PRKAG2	PMID 35288587
RBM20	PMID 35288587
RYR2	PMID 35288587
TMEM70	PMID 35288587
TNNI3	PMID 35288587
TNNT2	PMID 35288587
TPM1	PMID 35288587
TTN	PMID 35288587
VCL	PMID 35288587
FHOD3	PMID 35288587
NRAP	PMID 35288587
C1QBP	PMID 34003581
GYG1	PMID 27718144
RPS6KA3	PMID 3396137
TRIM37	PMID 36742244
ABCC9	PMID 35026164
ACTC1	PMID 35026164
BAG3	PMID 35026164
CRYAB	PMID 35026164
DES	PMID 35026164
LAMP2	PMID 35026164
LMNA	PMID 35026164
MYBPC3	PMID 35026164
MYH7	PMID 35026164
MYL2	PMID 35026164
MYL3	PMID 35026164
NEXN	PMID 35026164
PRKAG2	PMID 35026164
RBM20	PMID 35026164
SCN5A	PMID 35026164
SCO2	PMID 35026164
TNNI3	PMID 35026164
TNNT2	PMID 35026164
TPM1	PMID 35026164
TTN	PMID 35026164
TTR	PMID 35026164
VCL	PMID 35026164
SLC25A3	GenCC
AIFM1	100KGP (identified by the initial analysis)
ANKRD11	100KGP (identified by the initial analysis)
FBXL4	100KGP (identified by the initial analysis)
FKRP	100KGP (identified by the initial analysis)
MAP3K7	100KGP (identified by the initial analysis)
MCOLN1	100KGP (identified by the initial analysis)
NAXD	100KGP (identified by the initial analysis)
NDUFA4	100KGP (identified by the initial analysis)
NEB	100KGP (identified by the initial analysis)
NPHS2	100KGP (identified by the initial analysis)
RYR1	100KGP (identified by the initial analysis)
DSG2	100KGP (identified by the initial analysis)
FLNC	100KGP (identified by the initial analysis)
PPP1R13L	100KGP (identified by the initial analysis)
RBM20	100KGP (identified by the initial analysis)
TNNT2	100KGP (identified by the initial analysis)
MYBPC3	100KGP (identified by the initial analysis)
MYH7	100KGP (identified by the initial analysis)
PKP2	100KGP (identified by the initial analysis)
PTPN11	100KGP (identified by the initial analysis)
RAF1	100KGP (identified by the initial analysis)
TNNI3	100KGP (identified by the initial analysis)
TNNT2	100KGP (identified by the initial analysis)
ACTN2	100KGP (identified by the initial analysis)
NKX2-5	100KGP (identified by the initial analysis)
LMNA	100KGP (identified by the initial analysis)
PLD1	100KGP (identified by the initial analysis)
SCN5A	100KGP (identified by the initial analysis)
ALMS1	100KGP (identified by the initial analysis)
DES	100KGP (identified by the initial analysis)
DSP	100KGP (identified by the initial analysis)
FLNC	100KGP (identified by the initial analysis)
HADHA	100KGP (identified by the initial analysis)
LZTR1	100KGP (identified by the initial analysis)
MRPL44	100KGP (identified by the initial analysis)
NONO	100KGP (identified by the initial analysis)
SGCG	100KGP (identified by the initial analysis)

## Sheet: Table S4
Table S4: Genes on version 1 of the following UK PanelApp cardiomyopathy panels: Left Ventricular Noncompaction Cardiomyopathy, Dilated cardiomyopathy and conduction defects, Arrhythmogenic right ventricular cardiomyopathy, Hypertrophic cardiomyopathy. These panels include the genes most likely analysed in the initial analysis carried out by 100,000 Genome Project.
Gene
ABCC9
ACTC1
ACTN2
BAG3
CSRP3
DES
DMD
DSC2
DSG2
DSP
EYA4
FHL1
FKTN
GLA
JUP
LAMP2
LDB3
LMNA
MYBPC3
MYH6
MYH7
MYL2
MYL3
NEXN
PKP2
PLN
PRKAG2
RBM20
RYR2
SCN5A
SGCD
TAFFAZIN
TCAP
TMEM43
TNNC1
TNNI3
TNNT2
TPM1
TTN
VCL

## Sheet: Table S5
Table S5: Filters used for de novo variant annotations in 100,000 Genomes Project taken from Genomics England Research Documentation, https://re-docs.genomicsengland.co.uk/de_novo_data/
de novo base filters	Description	Notes
zygosity_filter*	The genotype must be heterozygous (1/0 or 0/1) for the offspring and reference homozygous (0/0) in the mother and the father.
mindepth_filter*	Minimum depth of 20X in the offspring and each of the parents.
maxdepth_filter	Maximum depth of 98X in the offspring. Following findings from Rahbari et. al, 2016
de novo stringent filters
altreadparent_filter	No more than one read supporting the alternate allele in either the mother or the father.
abratio_filter	The AB ratio in the offspring is between 0.3 and 0.7.
proximity_filter	DNV is not located within 20bp of another DNV within the same trio.
segmentalduplication_filter	No overlap with segmental duplications.	Taken from UCSC Table Browser for each genome assembly (Segmental Dups). Segmental duplications play an important role in both genomic disease and gene evolution. This track displays an analysis of the global organisation of these long-range segments of identity in genomic sequence.
simplerepeat_filter	No overlap with simple repeat regions.	Taken from UCSC Table Browser for each genome assembly (Simple Repeats). This track displays simple tandem repeats (possibly imperfect repeats) located by Tandem Repeats Finder (TRF) which is specialised for this purpose.
patch_filter	No overlap with patch regions.	Taken from UCSC Table Browser for each genome assembly (Fix Patches). When errors are corrected in the reference genome assembly, the Genome Reference Consortium (GRC) adds fix patch sequences containing the corrected regions.
stringent_filter	**All base and stringent filters pass.

## Sheet: Table S6
			All probands (n=1563)	Paediatric probands (n=144)	Adult probands (n=1419)
			n (%)	n (%)	n (%)
	Sex	Female	589 (38)	66 (46)	523 (37)
		Male	974 (62)	78 (54)	896 (63)
	Ancestry	Asian	105 (7)	21 (17*)	84 (*7)
		Black	53 (3)	9 (4*)	44 (*4)
		White	1070 (68)	86 (77*)	984 (*85)
		Mixed	21 (1)	<5	<20
		Other	30 (2)	<5	<30
		Not stated	284 (18)	21 (15)	263 (19)
	Family History	Yes	659 (42)	32 (22)	627 (44)
		No	933 (60)	112 (78)	792 (56)
	Primary CM	ARVC	126 (8)	<5	<125
		DCM	383 (25)	23 (16)	360 (25)
		HCM	794 (51)	35 (24)	759 (53)
		LVNC	50 (3)	13 (9)	37 (3)
		Mixed_CM	<20 (<1)	<5	<10
		Mixed_other	<20 (<1)	<5	<10
	Complex CM		195 (12)	65 (45)	130 (9)
	Table S6: Demographic characteristics of 1563 cardiomyopathy probands in the 100,000 Genome Project when stringent criteria are used to define children and adults. Participants with an age <= 16 years old documented at the time of consent to participate were designated as children meeting stringent age criteria. *% of known ancestry Primary CM: participants recruited under a specific cardiomyopat…

## Sheet: Table S7
	Family Group Type	Paediatric n (%)	Paed_solved n (%)	Adult n (%)	Adult_solved n (%)
	Duo with Mother or Father	19 (13)	<5	153 (11)	17 (10)
	Duo with other Biological Relative	<10	0	132 (9)	14 (8)
	Families with three or more Participants	10 (7)	<5	88 (6)	17 (10)
	Singleton	<10	0	939 (66)	109 (65)
	Trio with Mother and Father	108 (75)	24 (83)	107 (8)	12 (7)
	Table S7 – Family structures at enrolment for Paediatric and Adult Cardiomyopathy probands and solved probands in 100,000 Genome project (100KGP) when children are defined by stringent criteria. Participants with an age <= 16 years old documented at the time of consent to participate were designated as children meeting stringent age criteria. Paediatric – paediatric probands with cardiomyopathy (…

## Sheet: Table S8
	Disease Recruitment Category		Paediatric	Paediatric Solved	Adult	Adult Solved
			Probands (n)	Number solved (%)	Probands (n)	Number solved (%)
	Primary CM	DCM	26	<10	367	63 (17)
		HCM	35	8 (23)	762	74 (10)
		Other	18	<5	160	9 (6)
		All	79	16 (20)	1289	146 (11)
	Complex CM		65	13 (20)	130	23 (18)
	Total		144	29 (20)	1419	169 (12)
	Table S8: Number of paediatric and adult cardiomyopathy probands by disease recruitment category in the 100,000 Genome Project and the number and percentage of solved probands, using stringent criteria to define children. Participants with an age <= 16 years old documented at the time of consent to participate were designated as children meeting stringent age criteria. Primary CM: probands recrui…

## Sheet: Table S9
	Table S9: Participants in 100,000 Genomes Project were recruited and assigned a high-level category based on their disease called the ‘normalised specific disease’. There are some participants who were not recruited under a specific cardiomyopathy category but who have "cardiomyopathy' contained within the free text of their HPO terms e.g. dilated cardiomyopathy or hypertrophic cardiomyopathy etc…
	PAEDIATRIC			ADULT
	Normalised Specific Disease	Frequency		Normalised Specific Disease	Frequency
	Mitochondrial disorders	17		Mitochondrial disorders	17
	Congenital myopathy	9		Limb girdle muscular dystrophy	13
	Ultra-rare undescribed monogenic disorders	8		Congenital myopathy	10
	Undiagnosed metabolic disorders	8		Familial Thoracic Aortic Aneurysm Disease	6
	Intellectual disability	7		Distal myopathies	5
	Limb girdle muscular dystrophy	7		Familial congenital heart disease	5
	Familial congenital heart disease	5		Ultra-rare undescribed monogenic disorders	5
	Syndromic congenital heart disease	5		Long QT syndrome	<5
	Noonan syndrome plus other features	<5		Rhabdomyolysis and metabolic muscle disorders	<5
	Undiagnosed monogenic disorder seen in a specialist genetics clinic	<5		Brugada syndrome	<5
	Atypical Beckwith-Wiedemann syndrome	<5		Congenital Anomaly of the Kidneys and Urinary Tract (CAKUT)	<5
	Congenital muscular dystrophy	<5		Intellectual disability	<5
	Noonan syndrome	<5		Syndromic congenital heart disease	<5
	Unexplained monogenic fetal disorders	<5		Undiagnosed monogenic disorder seen in a specialist genetics clinic	<5
	Arthrogryposis	<5		Congenital muscular dystrophy	<5
	Atypical haemolytic uraemic syndrome	<5		Cystic kidney disease	<5
	Autosomal recessive congenital ichthyosis	<5		Early onset and familial Parkinson's Disease	<5
	Craniosynostosis syndromes	<5		Epilepsy plus other features	<5
	Cystic kidney disease	<5		Hereditary ataxia	<5
	Distal myopathies	<5		Hereditary spastic paraplegia	<5
	Epileptic encephalopathy	<5		Mucopolysaccharideosis, Gaucher, Fabry	<5
	GAinS study	<5		Primary immunodeficiency	<5
	Hereditary spastic paraplegia	<5		Bardet-Biedl Syndrome	<5
	Insulin resistance (including lipodystrophy)	<5		Classical Ehlers-Danlos Syndrome	<5
	Intracerebral calcification disorders	<5		Classical tuberous sclerosis	<5
	IUGR and IGF abnormalities	<5		Congenital myaesthenia	<5
	Ketotic hypoglycaemia	<5		Early onset dementia	<5
	Paediatric congenital malformation-dysmorphism-tumour syndromes	<5		Familial breast and or ovarian cancer	<5
	Palmoplantar keratoderma and erythrokeratodermas	<5		Hereditary haemorrhagic telangiectasia	<5
	Rhabdomyolysis and metabolic muscle disorders	<5		Idiopathic ventricular fibrillation	<5
	Schizophrenia plus additional features	<5		Osteogenesis imperfecta	<5
	Single autosomal recessive mutation in rare disease	<5		Rod Dysfunction Syndrome	<5
	Two or more categories	<5		Undiagnosed metabolic disorders	<5
				Two or more categories	<5

[truncated: 3 more sheets: Table S10, Table S11, Table S12]
